# Supplementary material for: Octreotide inhibits secretion of IGF-1 from orbital fibroblasts in patients with thyroid-associated ophthalmopathy via inhibition of the NF-κB pathway
Source: PubMed Central journal article supplement (PMC8062018; doi:10.1371/journal.pone.0249988), 2021-04-22

# YSW 111

BD FACSDiva 8.0.1

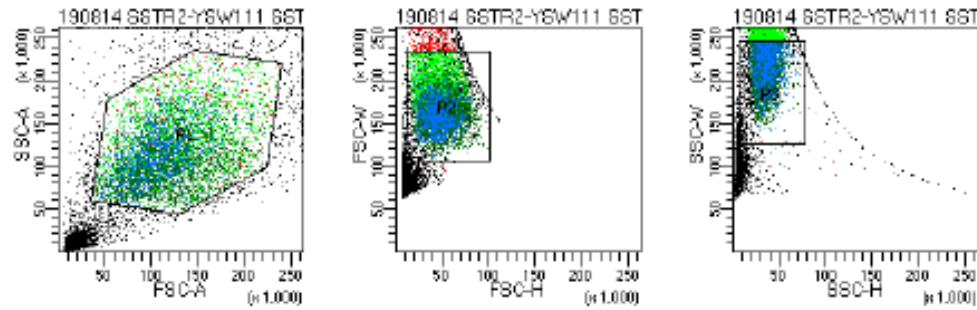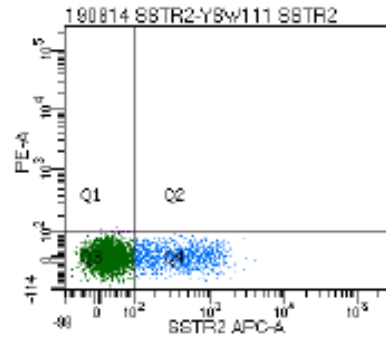

Tube: YSW111 SSTR2

| Population | #Events | %Parent | %Total |
|------------|---------|---------|--------|
| All Events | 10,000  | ###     | 100.0  |
| P1         | 6,354   | 63.5    | 63.5   |
| P2         | 6,076   | 95.6    | 60.8   |
| P3         | 3,922   | 64.5    | 39.2   |
| Q1         | 8       | 0.2     | 0.1    |
| Q2         | 1       | 0.0     | 0.0    |
| Q3         | 2,944   | 75.1    | 29.4   |
| Q4         | 969     | 24.7    | 9.7    |

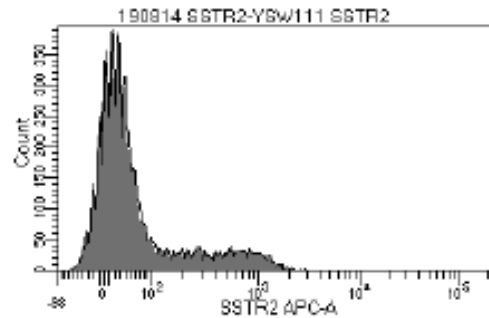

# YSW 116

BD FACSDiva 8.0.1

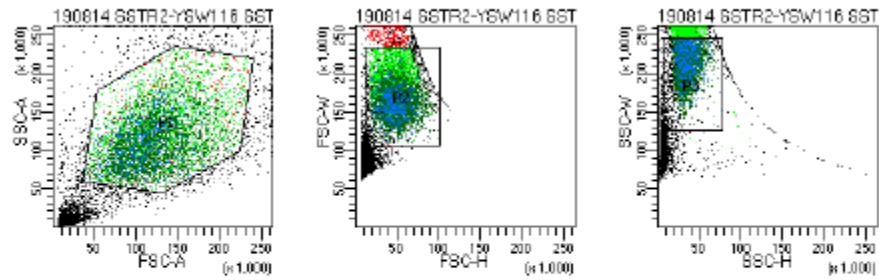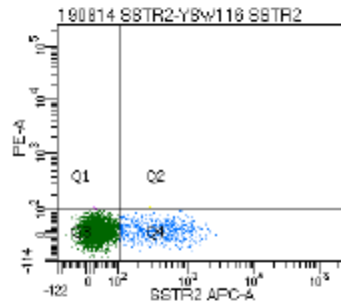

Tube: YSW116 SSTR2

| Population | #Events | %Parent | %Total |
|------------|---------|---------|--------|
| All Events | 10,000  | ###     | 100.0  |
| P1         | 6,211   | 62.1    | 62.1   |
| P2         | 5,917   | 95.3    | 59.2   |
| P3         | 3,819   | 64.5    | 38.2   |
| Q1         | 2       | 0.1     | 0.0    |
| Q2         | 1       | 0.0     | 0.0    |
| Q3         | 3,244   | 84.9    | 32.4   |
| Q4         | 572     | 15.0    | 5.7    |

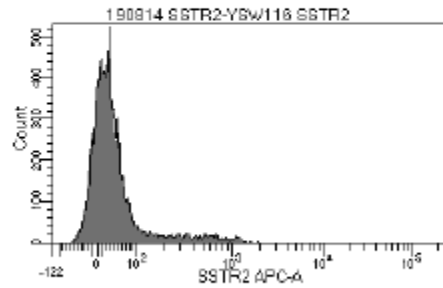

# YSW 155

BD FACSDiva 8.0.1

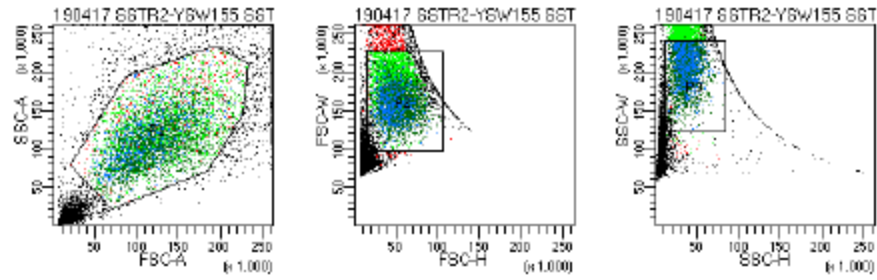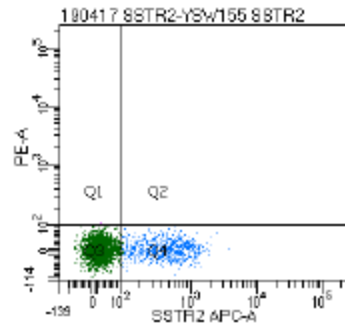

Tube: YSW155 SSTR2

| Population | #Events | %Parent | %Total |
|------------|---------|---------|--------|
| All Events | 10,000  | ###     | 100.0  |
| P1         | 5,426   | 54.3    | 54.3   |
| P2         | 4,938   | 91.0    | 49.4   |
| P3         | 3,086   | 62.5    | 30.9   |
| Q1         | 1       | 0.0     | 0.0    |
| Q2         | 0       | 0.0     | 0.0    |
| Q3         | 2,392   | 77.5    | 23.9   |
| Q4         | 693     | 22.5    | 6.9    |

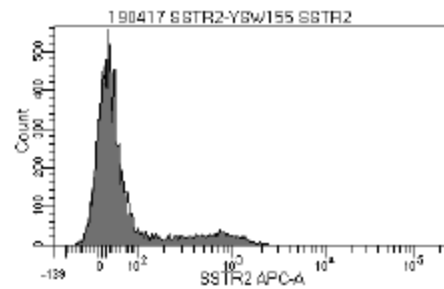

# YSW 135

BD FACSDiva 8.0.1

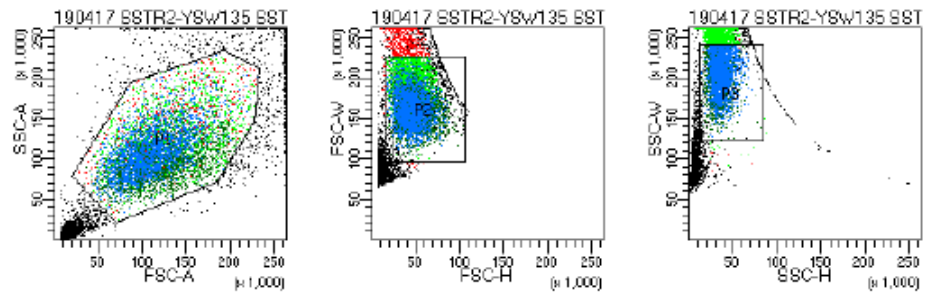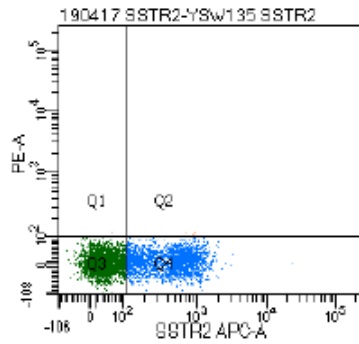

Tube: YSW135\_SSTR2

| Population | #Events | %Parent | %Total |
|------------|---------|---------|--------|
| All Events | 10,000  | ###     | 100.0  |
| P1         | 7,300   | 73.0    | 73.0   |
| P2         | 6,668   | 91.3    | 66.7   |
| P3         | 4,774   | 71.6    | 47.7   |
| Q1         | 1       | 0.0     | 0.0    |
| Q2         | 3       | 0.1     | 0.0    |
| Q3         | 2,464   | 51.6    | 24.6   |
| Q4         | 2,306   | 48.3    | 23.1   |

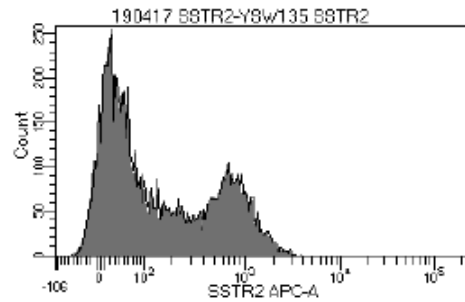

# YSW 137

BD FACSDiva 8.0.1

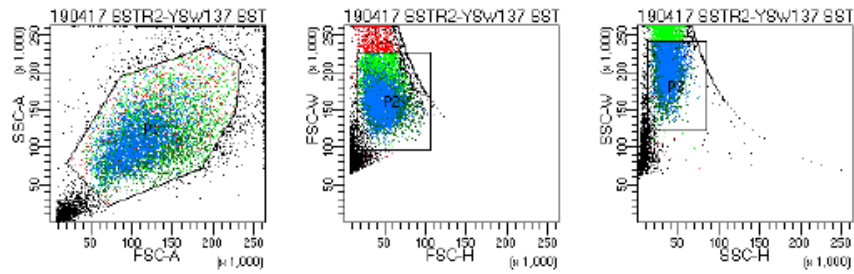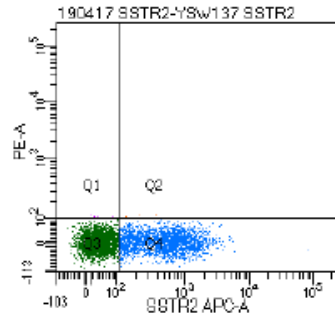

Tube: YSW137 SSTR2

| Population | #Events | %Parent | %Total |
|------------|---------|---------|--------|
| All Events | 10,000  | ###     | 100.0  |
| P1         | 7,076   | 70.8    | 70.8   |
| P2         | 6,461   | 91.3    | 64.6   |
| P3         | 4,692   | 72.6    | 46.9   |
| Q1         | 4       | 0.1     | 0.0    |
| Q2         | 4       | 0.1     | 0.0    |
| Q3         | 2,408   | 51.3    | 24.1   |
| Q4         | 2,276   | 48.5    | 22.8   |

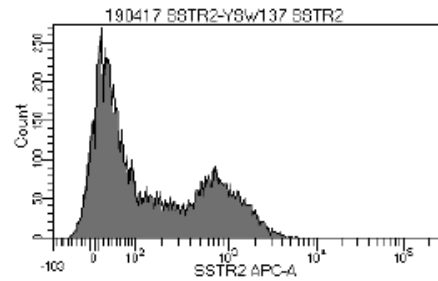

# YSW 162

BD FACSDiva 8.0.1

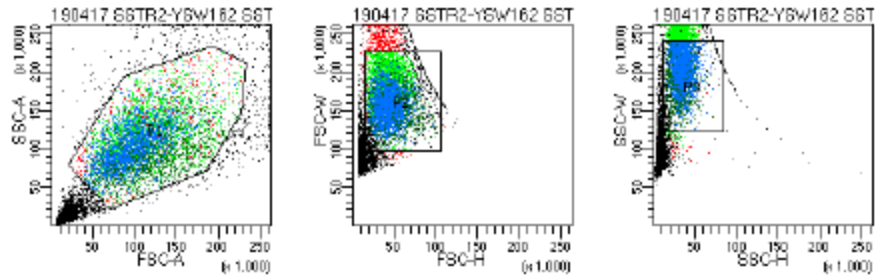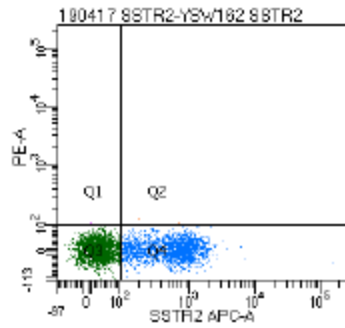

Tube: YSW162 SSTR2

| Population | #Events | %Parent | %Total |
|------------|---------|---------|--------|
| All Events | 10,000  | ###     | 100.0  |
| P1         | 6,562   | 65.6    | 65.6   |
| P2         | 6,069   | 92.5    | 60.7   |
| P3         | 3,771   | 62.1    | 37.7   |
| Q1         | 1       | 0.0     | 0.0    |
| Q2         | 2       | 0.1     | 0.0    |
| Q3         | 1,913   | 50.7    | 19.1   |
| Q4         | 1,855   | 49.2    | 18.6   |

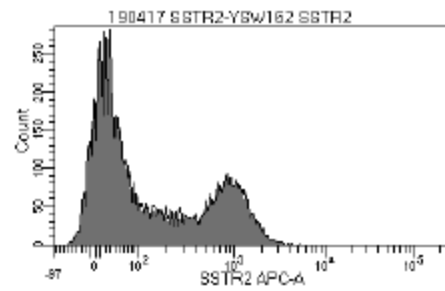

Supplement: pone.0249988.s005.pdf [file pone.0249988.s005.pdf]
