# Supplementary material for: Octreotide inhibits secretion of IGF-1 from orbital fibroblasts in patients with thyroid-associated ophthalmopathy via inhibition of the NF-κB pathway
Source: PubMed Central journal article supplement (PMC8062018; doi:10.1371/journal.pone.0249988), 2021-04-22

IKK $\beta$

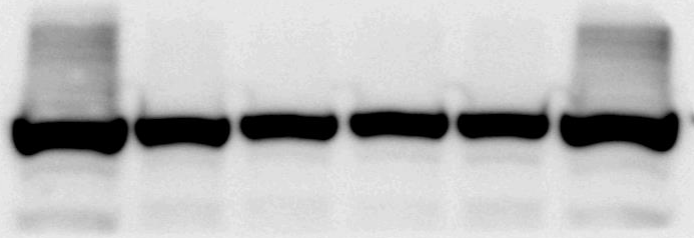

I $\kappa$ B $\alpha$

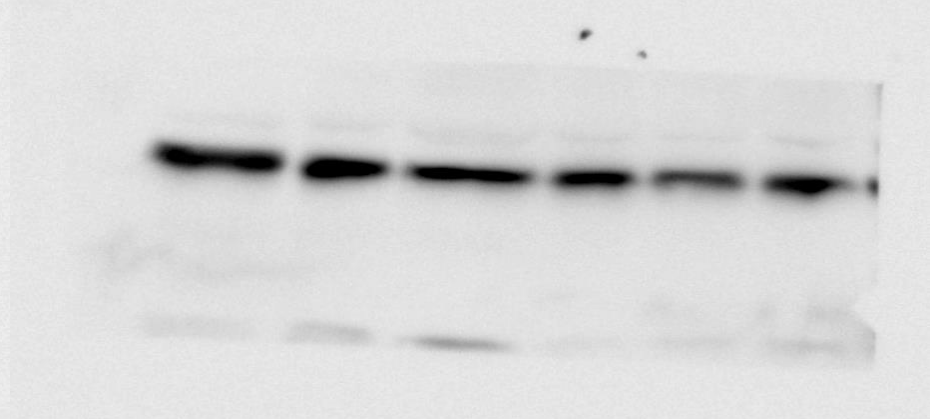

P-IKK $\alpha/\beta$

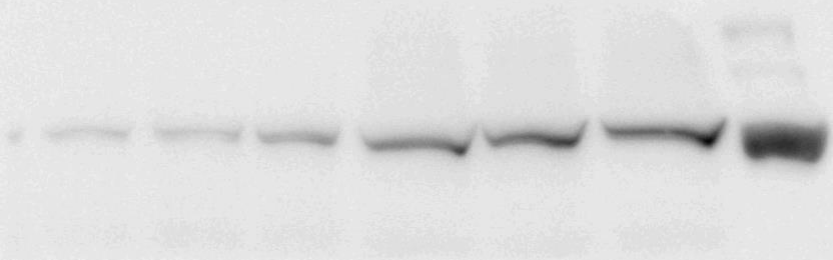

$\beta$ -actin

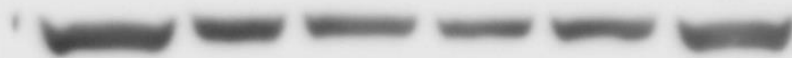

NF-kB p65

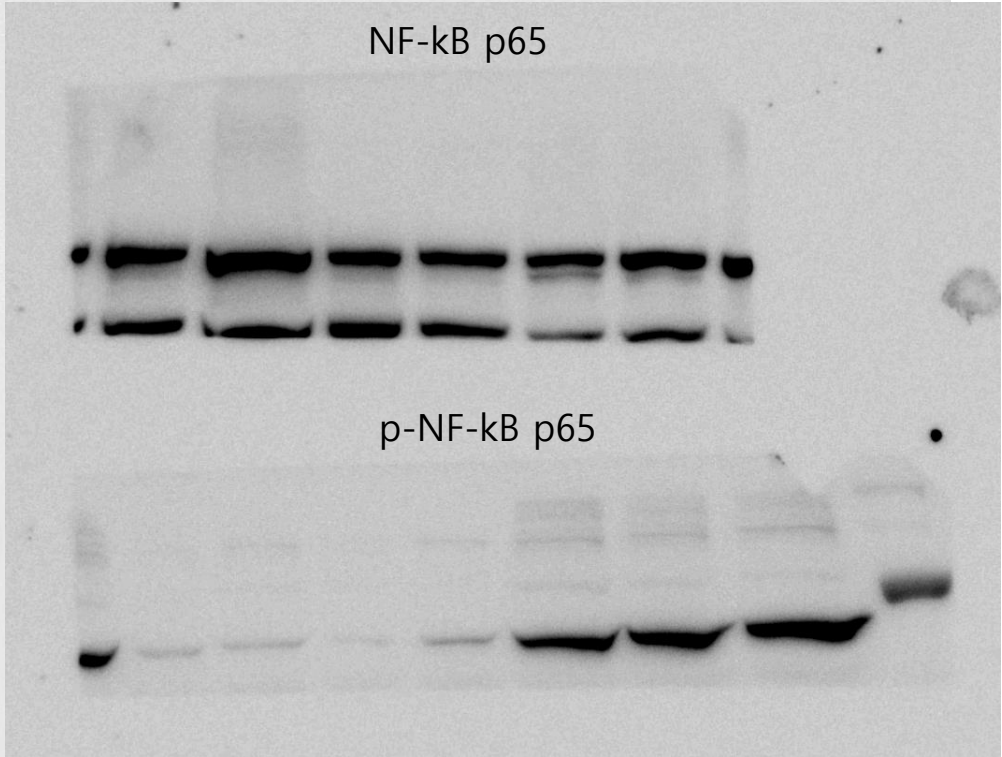

p-NF-kB p65

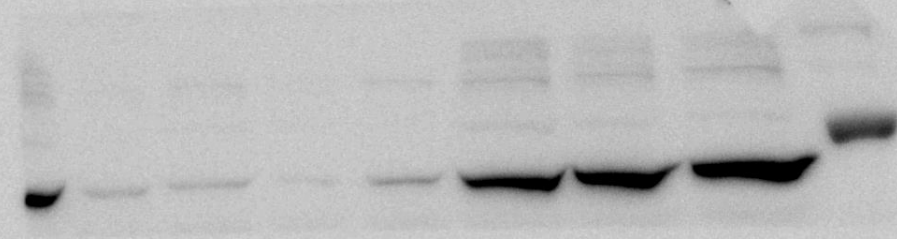

p-IKK $\alpha$ / $\beta$  (#150)

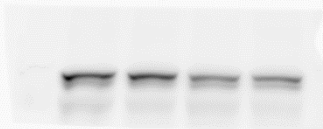

p-IKK $\alpha$ / $\beta$  (#103)

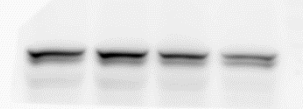

I $\kappa$ B (#103)

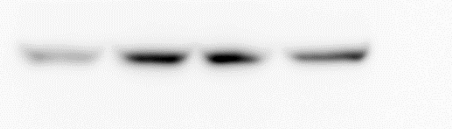

I $\kappa$ B (#150)

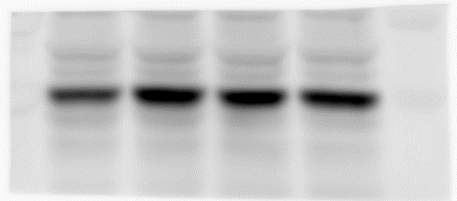

p-NF- $\kappa$ B p65 (#150)

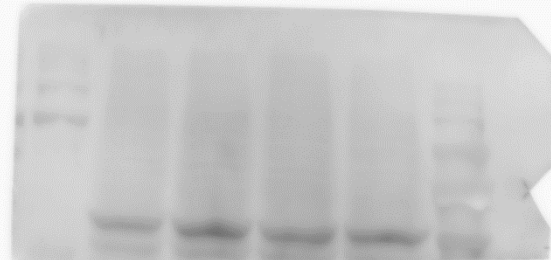

p-NF- $\kappa$ B p65 (#103)

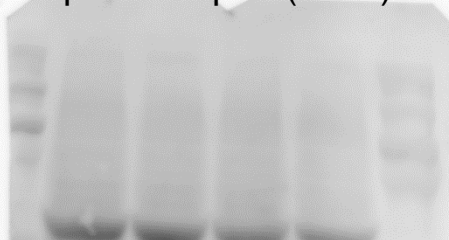

IKK $\beta$  (#150)

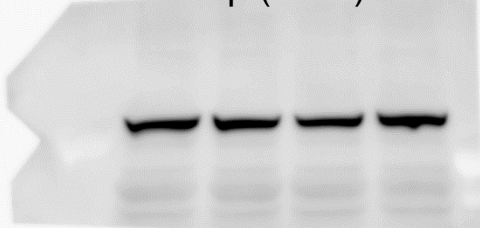

$\beta$ -actin (#103)

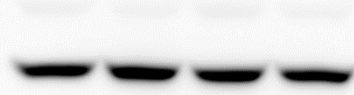

NF- $\kappa$ B p65 (#150)

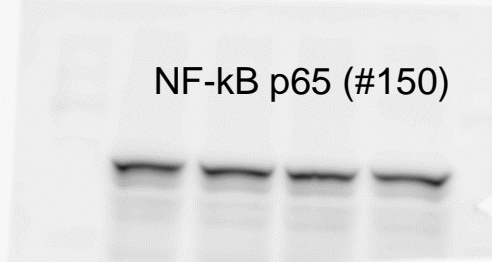

IKK $\beta$  (#103)

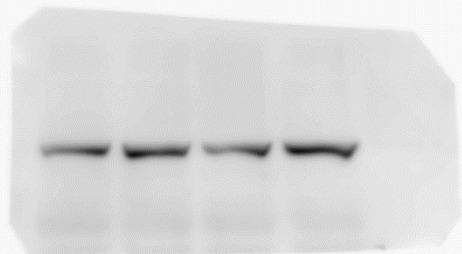

$\beta$ -actin (#150)

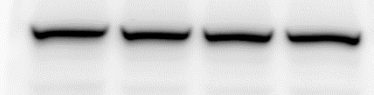

NF- $\kappa$ B p65 (#103)

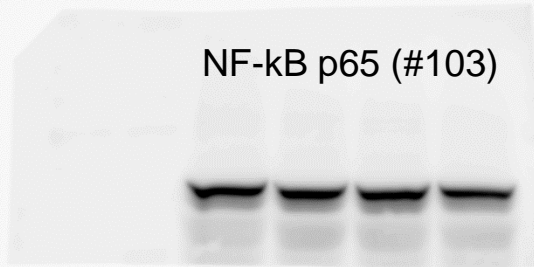

Supplement: pone.0249988.s009.pdf [file pone.0249988.s009.pdf]
